# Supplementary material
Source: PubMed Central journal article supplement (PMC3122249)

## SUPPLEMENTAL DATA

**Supp. Fig. 1.** Lipid analysis of PDM and TM fractions.

*Synechocystis* 6803 PDMs and TMs were obtained by two rounds of sucrose density-gradient centrifugation (5). Lipids were extracted from the different fractions, equal volumes separated via thin layer chromatography and visualized by incineration.

**Supp. Fig. 2.** Membrane localization of different PSII assembly factors in *pitt*<sup>-</sup> and *psbB*<sup>-</sup>.

*Synechocystis* 6803 cell extracts of *pitt*<sup>-</sup> (**A**) and *psbB*<sup>-</sup> (**B**) mutant strains were separated by two consecutive rounds of sucrose density-gradient centrifugation and analyzed as described in the legend to Fig. 2.

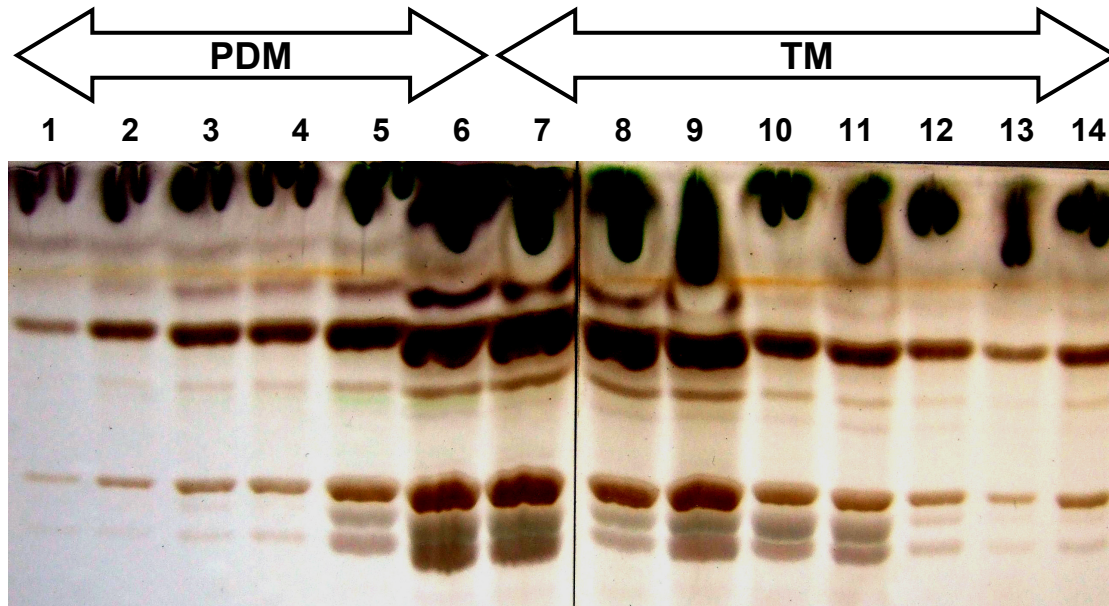

Supp. Fig. 1

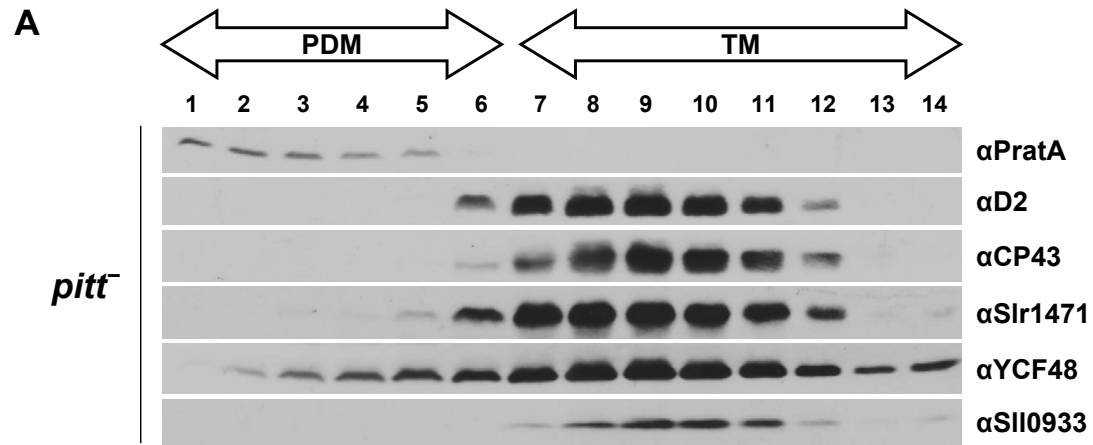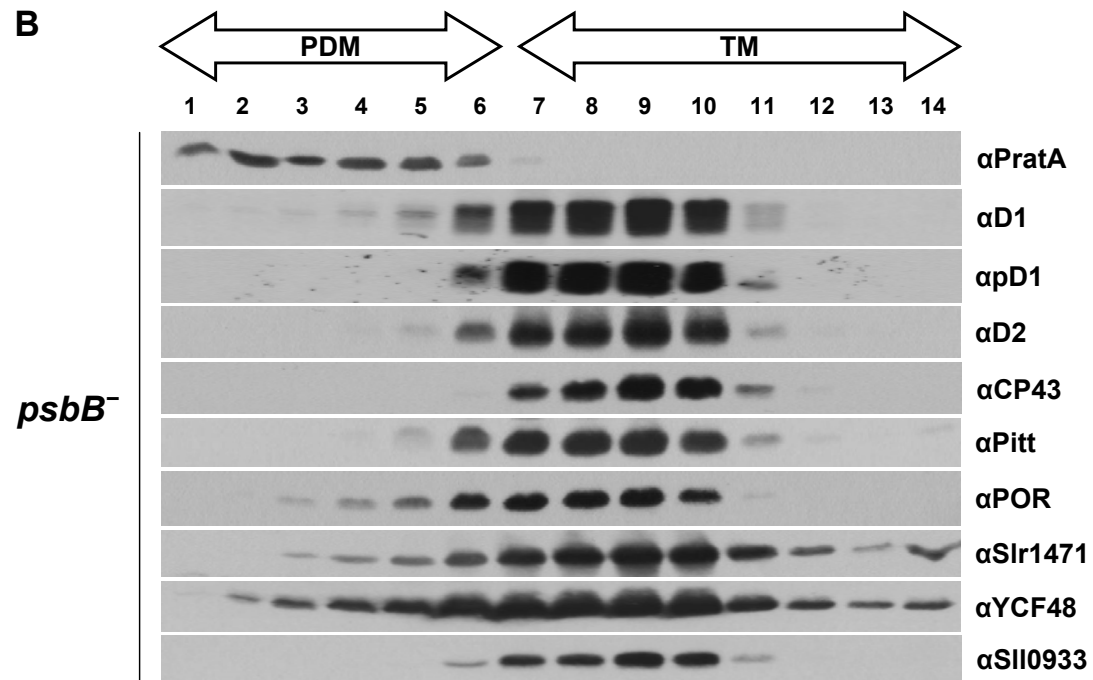

Supplement: supp_M111.237867_jbc.M111.237867-1.pdf [file supp_M111.237867_jbc.M111.237867-1.pdf]
